# Supplementary material for: 10 cm2 nonfullerene solar cells with efficiency over 10% using HxMoO3-assisted growth of silver electrodes with a low threshold thickness of 4 nm
Source: Royal Society of Chemistry journal article supplement (doi:10.1039/c9ta11939f), 2019-11-20
Supplement: c9ta11939f1.pdf [file c9ta11939f1.pdf]

## Electronic Supplementary Information

10 cm<sup>2</sup> nonfullerene solar cells with efficiency over 10% using H<sub>x</sub>MoO<sub>3</sub>-  
assisted growth of silver electrodes with a low threshold thickness of 4 nm

Xueshi Jiang, Lulu Sun, Wen Wang, Fei Qin, Cong Xie, Lin Hu, and Yinhua Zhou\*

*Wuhan National Laboratory for Optoelectronics, Huazhong University of Science and Technology,  
Wuhan 430074, China*

\*Corresponding author. Email: [yh\\_zhou@hust.edu.cn](mailto:yh_zhou@hust.edu.cn)

**Table S1.** Summary of nonfullerene large-area ( $> 2 \text{ cm}^2$ ) device in previous reports.<sup>1-6</sup>

| Area<br>[cm <sup>2</sup> ] | PCE<br>[%] | Year | Ref. |
|----------------------------|------------|------|------|
| 3.48                       | 8.6        | 2018 | [1]  |
| 8                          | 6          | 2018 | [2]  |
| 18                         | 6.3        | 2018 | [3]  |
| 60                         | 5          | 2018 | [4]  |
| 2                          | 6          | 2019 | [5]  |
| 3.2                        | 8.1        | 2019 | [6]  |

**Table S2.** Photovoltaic parameters of OSCs with MoO<sub>3</sub> and H<sub>x</sub>MoO<sub>3</sub> as HTL. The device structure is glass/ITO/ZnO/PM6:IT-4F/HTL/Ag. All devices were measured under 100 mW cm<sup>-2</sup> AM 1.5G illumination.

| Area<br>[cm <sup>2</sup> ] | HTL                             | $J_{sc}$<br>[mA/cm <sup>2</sup> ] | $V_{oc}$<br>[V] | FF   | PCE<br>[%] |
|----------------------------|---------------------------------|-----------------------------------|-----------------|------|------------|
| 0.1                        | MoO <sub>3</sub>                | 20.37                             | 0.86            | 0.76 | 13.34      |
| 0.1                        | H <sub>x</sub> MoO <sub>3</sub> | 19.76                             | 0.85            | 0.75 | 12.63      |

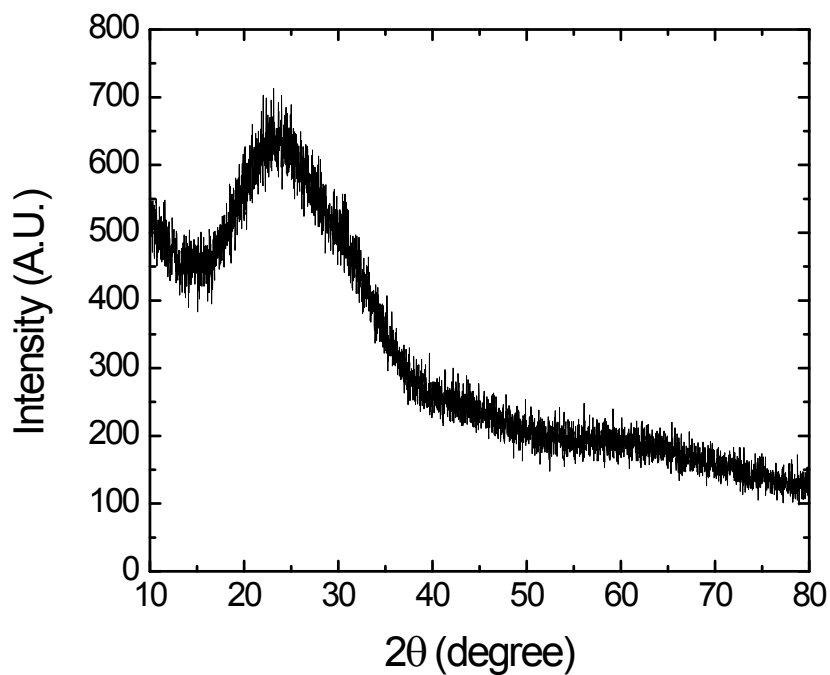

**Figure S1.** X-ray diffraction (XRD) pattern of  $H_xMoO_3$ .

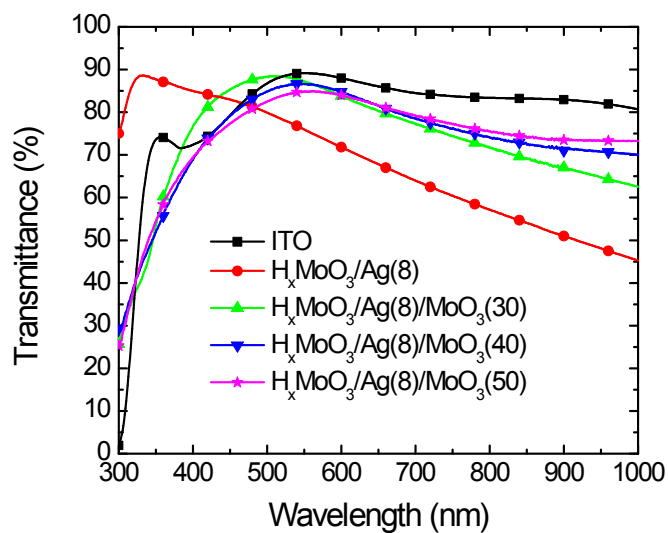

**Figure S2.** Optical transmittance of transparent electrode with different antireflective  $MoO_3$  thickness when the thickness of Ag is fixed at 8 nm.

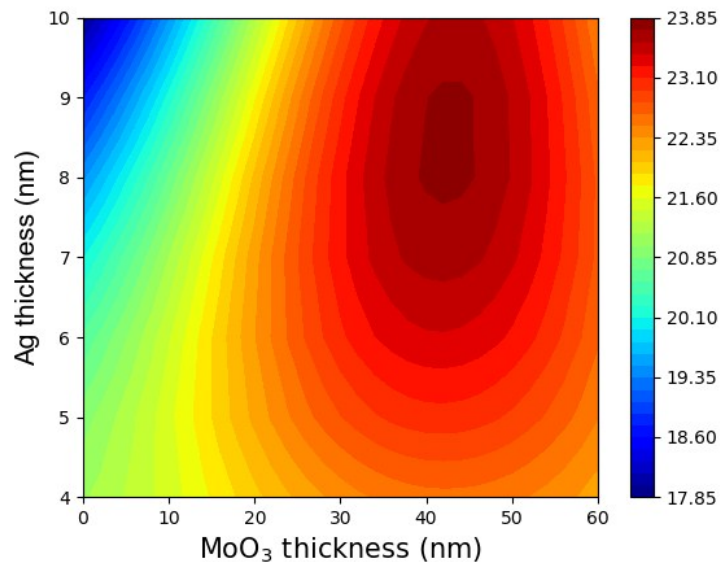

**Figure S3.** Optically simulated photocurrent, assuming the IQE=100%, of top-illuminated device as a function of thicknesses of ut-Ag and MoO<sub>3</sub> ARL.

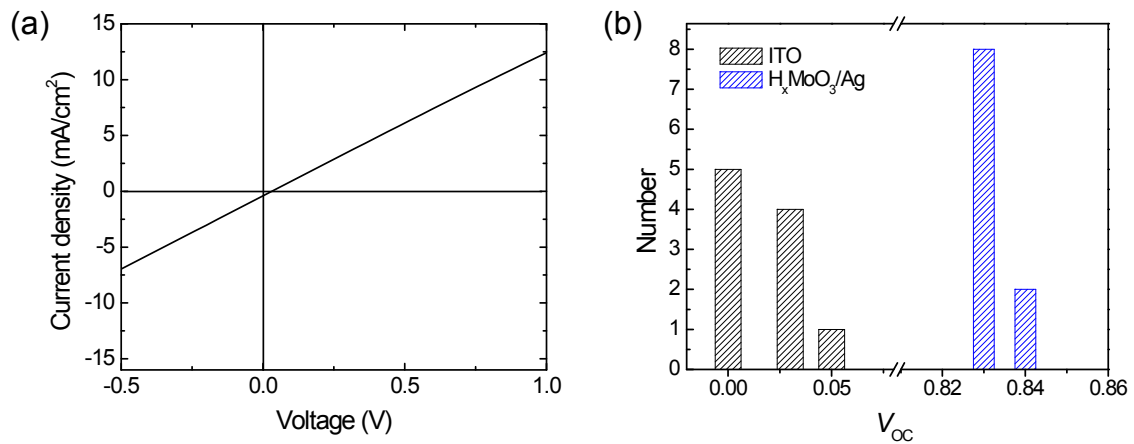

**Figure S4.** (a) Current density-voltage ( $J$ - $V$ ) characteristics under AM 1.5G illumination of 10 cm<sup>2</sup> solar cell on ITO. The device structure is ITO/ZnO/PM6:IT-4F/MoO<sub>3</sub>/Ag. (b) Histogram distribution of open-circuit voltage for 10 cm<sup>2</sup> devices on ITO and thick opaque Ag on H<sub>x</sub>MoO<sub>3</sub>.

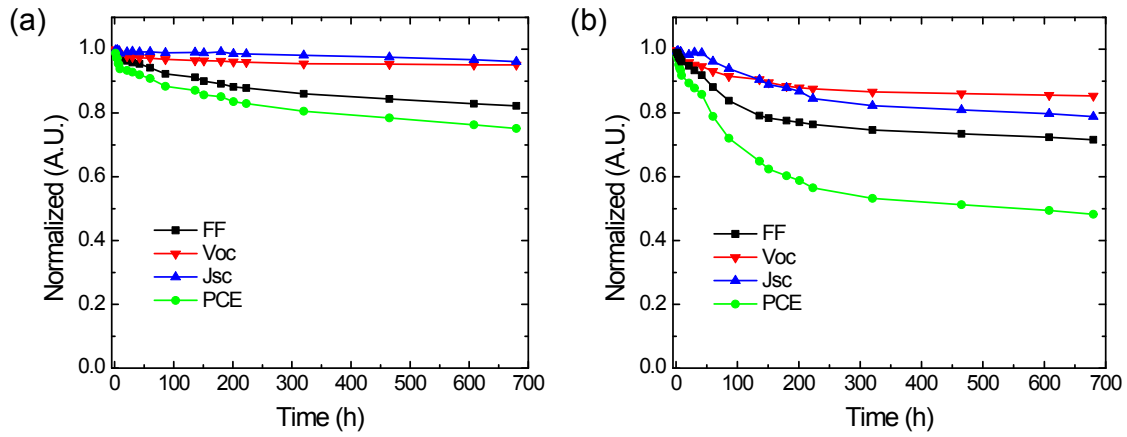

**Figure S5.** Normalized photovoltaic parameters of (a) ut-Ag cell (glass/ $H_xMoO_3$ /70-nm Ag/ZnO/PM6:IT-4F/ $H_xMoO_3$ /ut-Ag/ $MoO_3$ ) and (b) reference cell (ITO/ZnO/PM6:IT-4F/ $MoO_3$ /Ag) under continuous a LED white light illumination up to 680 hours.

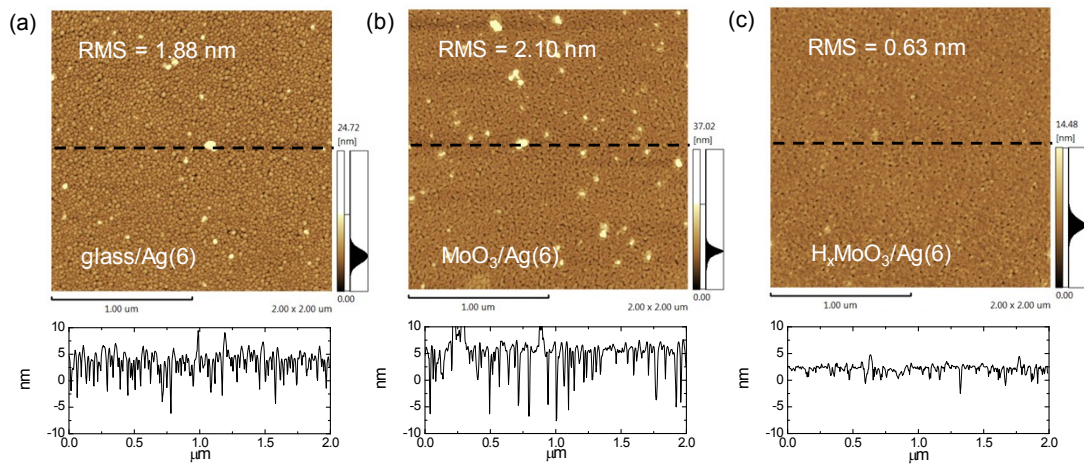

**Figure S6.** Atomic force microscope (AFM) images of 6-nm Ag on different surface: (a) glass; (b)  $MoO_3$ ; (c)  $H_xMoO_3$ . The dash lines indicate the position of sectional height distribution shown underneath.

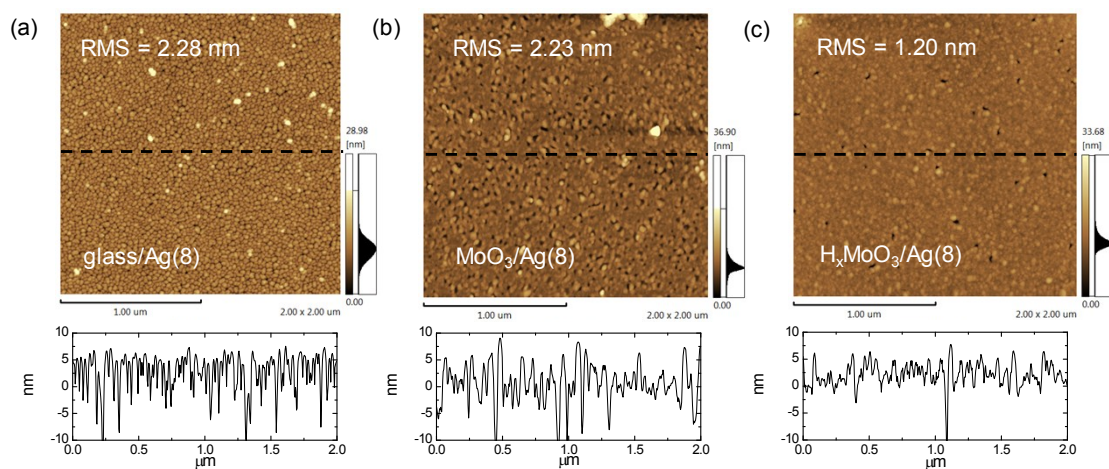

**Figure S7.** Atomic force microscope (AFM) images of 8-nm Ag on different surface: (a) glass; (b)  $\text{MoO}_3$ ; (c)  $\text{H}_x\text{MoO}_3$ . The dash lines indicate the position of sectional height distribution shown underneath.

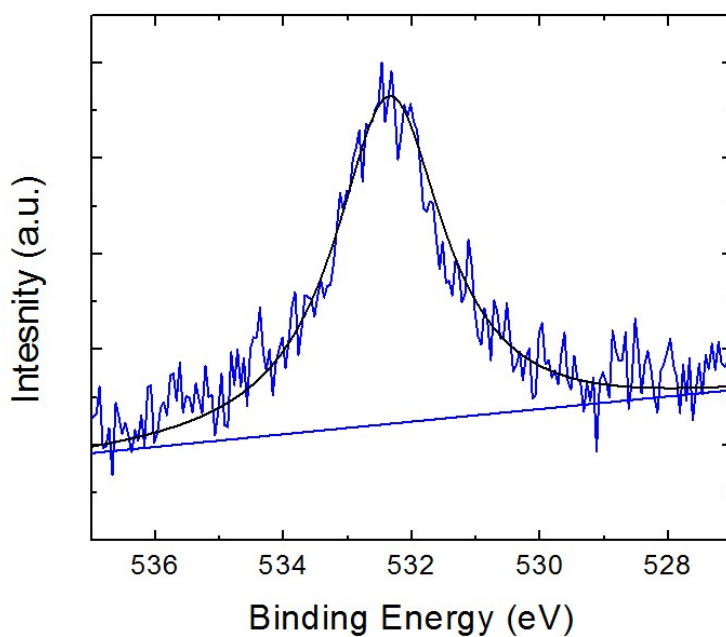

**Figure S8.** O 1s XPS spectrum of 70-nm Ag deposited on glass. The peak at 532 eV was assigned to the dissolved oxygen in silver bulk<sup>7,8</sup>.

## References:

1. T. Zhang, G. Zeng, F. Ye, X. Zhao and X. Yang, *Advanced Energy Materials*, 2018, **8**, 1801387.
2. L. Mao, L. Sun, B. Luo, Y. Jiang and Y. Zhou, *Journal of Materials Chemistry A*, 2018, **6**, 5817-5824.
3. L. Mao, B. Luo, L. Sun, S. Xiong, J. Fan, F. Qin, L. Hu, Y. Jiang, Z. Li and Y. Zhou, *Materials Horizons*, 2018, **5**, 123-130.
4. S. Strohm, F. Machui, S. Langner, P. Kubis, N. Gasparini, M. Salvador, I. McCulloch, H. J. Egelhaaf and C. J. Brabec, *Energy & Environmental Science*, 2018, **11**, 2225-2234.
5. D. Corzo, K. Almasabi, E. Bihar, S. Macphee, D. Rosas-Villalva, N. Gasparini, S. Inal and D. Baran, *Advanced Materials Technologies*, 2019, **4**, 1900040.
6. L. Sun, X. Jiang and Y. Zhou, *Journal of Energy Chemistry*, 2019, **37**, 220-224.
7. A. I. Boronin, S. V. Koscheev and G. M. Zhidomirov, *Journal of Electron Spectroscopy and Related Phenomena*, 1998, **96**, 43-51.
8. X. Bao, M. Muhler, T. Schedel-Niedrig and R. Schlögl, *Physical Review B*, 1996, **54**, 2249-2262.
